# Supplementary material for: Thermodynamic study of the complexation between Nd3+and functionalized diacetamide ligands in solution
Source: Royal Society of Chemistry journal article supplement (doi:10.1039/c6dt01694d), 2016-01-01
Supplement: c6dt01694d1.pdf [file c6dt01694d1.pdf]

# **Thermodynamic Study of the Complexation between Nd<sup>3+</sup> and Functionalized Diacetamide Ligands in Solution**

Phuong V. Dau,<sup>a</sup> Zhicheng Zhang,<sup>a</sup> Phuong D. Dau,<sup>a</sup> John K. Gibson,<sup>a</sup> and Linfeng Rao<sup>a\*</sup>

*Chemical Science Division*

*Lawrence Berkeley National Laboratory*

*One Cyclotron Rd., Berkeley, CA, United States 94720*

\*Email: lrao@lbl.gov, Phone: 1-510-486-5427, Fax: 1-510-486-5596.

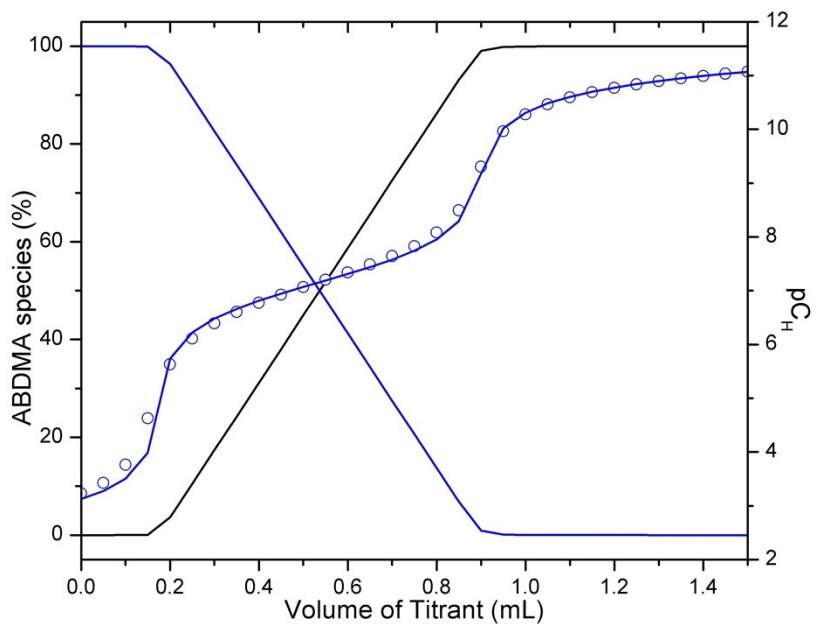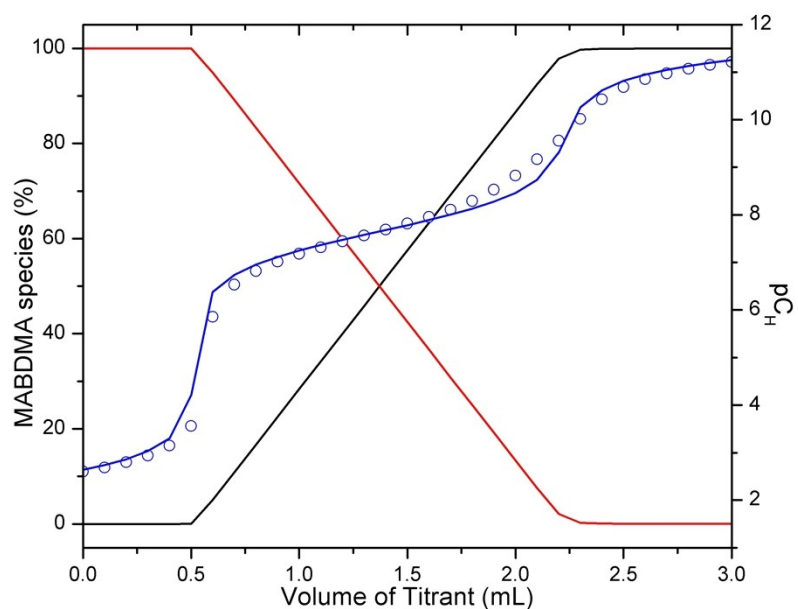

**Figure S1.** Potentiometric titrations to determine the protonation stability constant of ABDMA (top) and MABDMA (bottom). Black line represents L, red line represents  $HL^+$ , emptied blue circles represent observed  $pC_H$ , and blue line represents calculated  $pC_H$ . Detailed titration conditions are in Table S1.

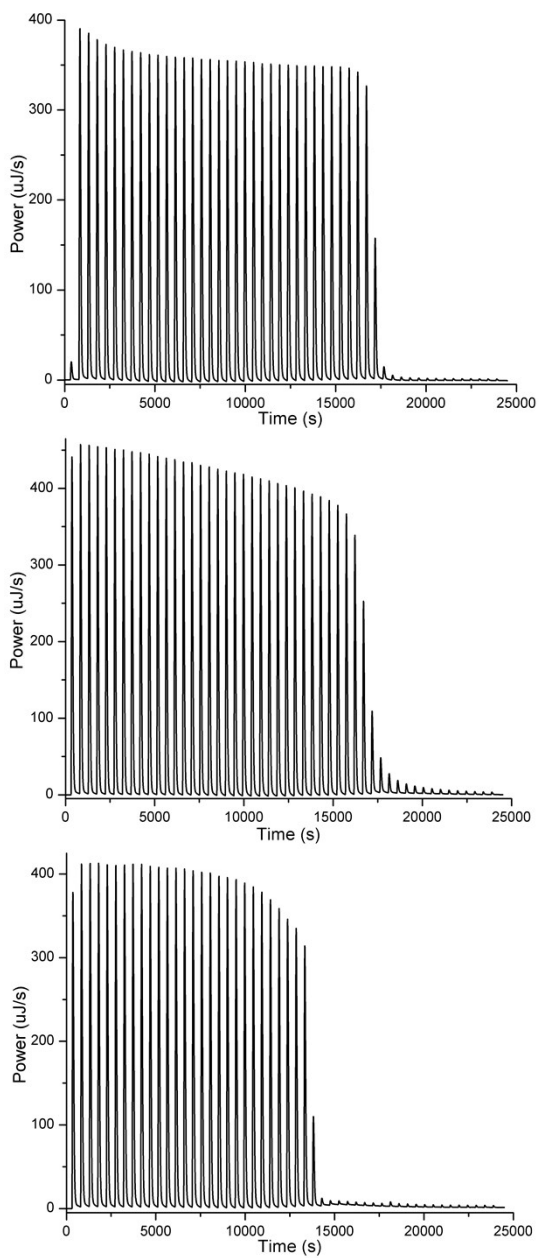

**Figure S2.** Thermograms of calorimetric titrations to determine the enthalpy for the protonation of BnABDMA (top), ABDMA (middle), and MABDMA (bottom).

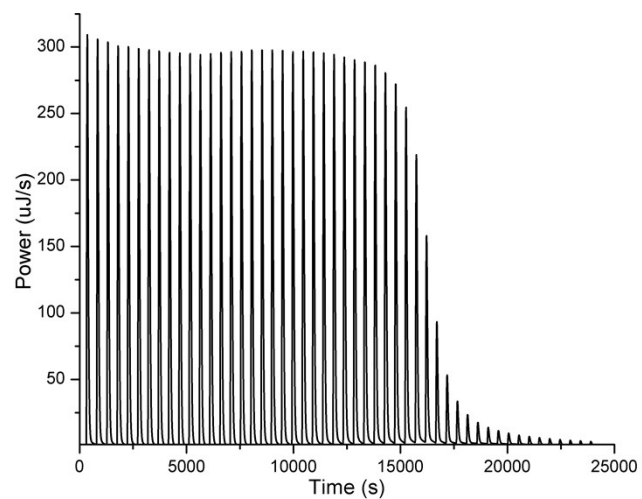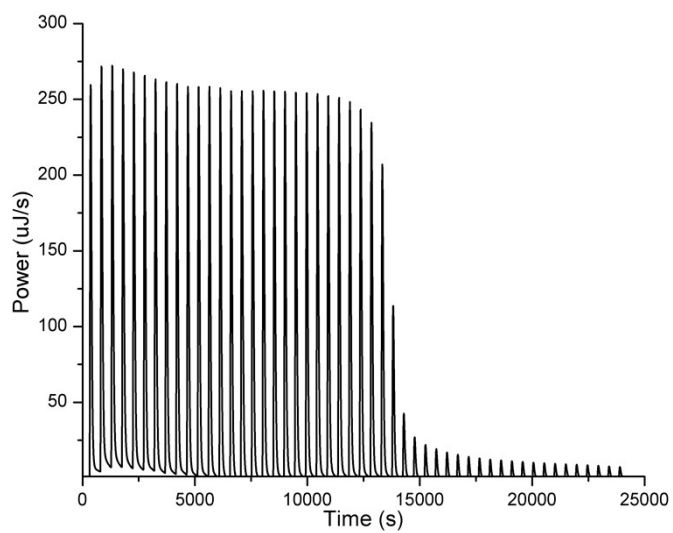

**Figure S3.** Thermograms of calorimetric titrations to determine the enthalpy for the formation of  $\text{Nd}^{3+}$  complexes with ABDMA (top) and MABDMA (bottom).

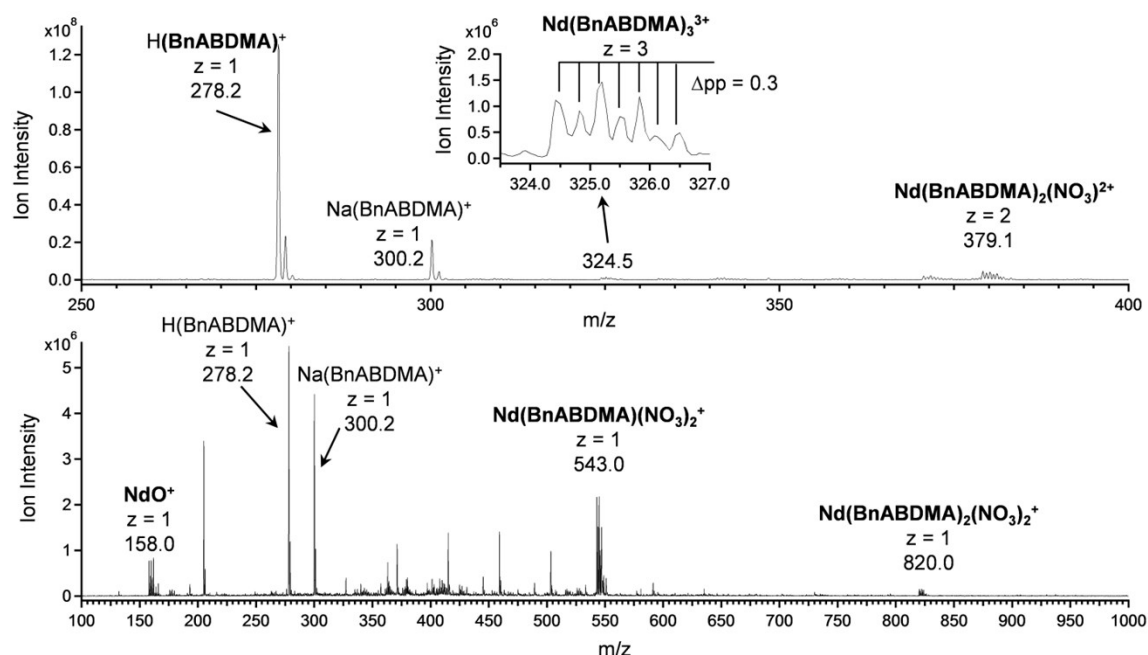

**Figure S4.** ESI-MS characterization of  $\text{Nd}^{3+}$  complexes with BnABDMA. In the top spectrum, triply and doubly charged  $\text{Nd}^{3+}$  complexes were observed, including  $\text{Nd}(\text{ABDMA})_3^{3+}$  and  $\text{Nd}(\text{BnABDMA})_2(\text{NO}_3)_2^{2+}$ . An inset figure shows a peak to peak separation of  $\Delta p p = 0.3$  m/z for  $\text{Nd}(\text{ABDMA})_3^{3+}$ . The bottom spectrum shows singly charged complexes of  $\text{Nd}(\text{BnABDMA})(\text{NO}_3)_2^+$  and  $\text{Nd}(\text{BnABDMA})_2(\text{NO}_3)_2^+$ .  $\text{NdO}^+$  is suggested to produce by reaction of  $\text{Nd}^{3+}$  with the anodic oxidation products of water.

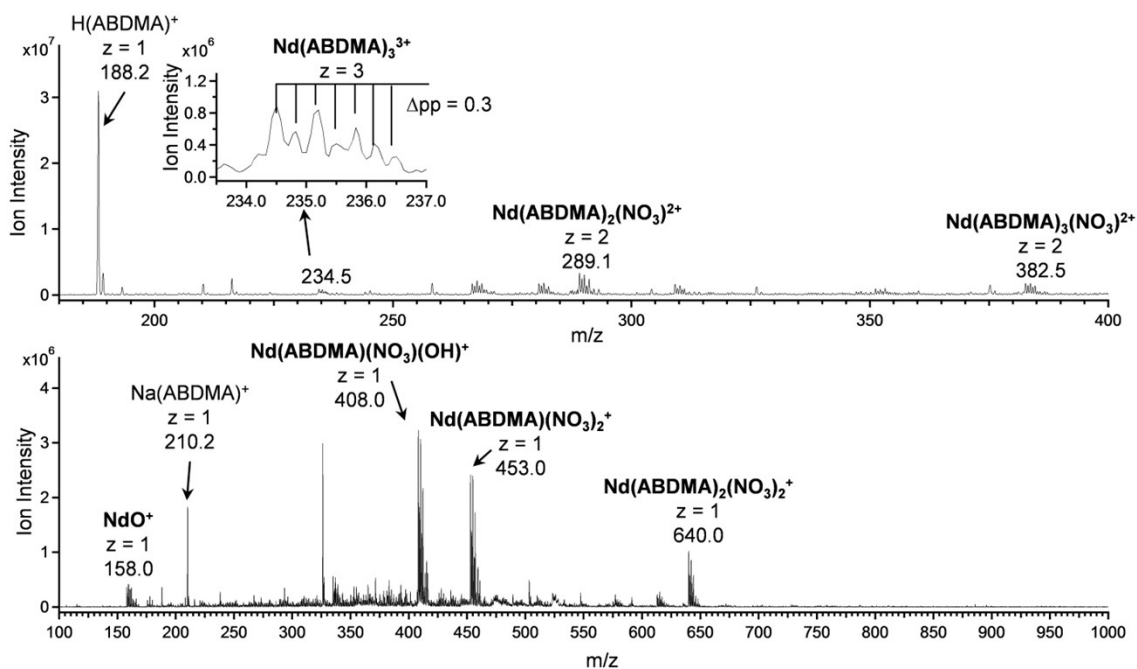

**Figure S5.** ESI-MS characterization of Nd<sup>3+</sup> complexes with ABDMA. In the top spectrum, triply and doubly charged Nd<sup>3+</sup> complexes were observed, including Nd(ABDMA)<sub>3</sub><sup>3+</sup>, Nd(ABDMA)<sub>2</sub>(NO<sub>3</sub>)<sub>2</sub><sup>2+</sup>, and Nd(ABDMA)<sub>3</sub>(NO<sub>3</sub>)<sub>2</sub><sup>2+</sup>. An inset figure shows a peak to peak separation of Δpp = 0.3 m/z for Nd(ABDMA)<sub>3</sub><sup>3+</sup>. The bottom spectrum shows singly charged complexes of Nd(ABDMA)(NO<sub>3</sub>)<sub>2</sub><sup>+</sup>, Nd(ABDMA)<sub>2</sub>(NO<sub>3</sub>)<sub>2</sub><sup>+</sup>, and Nd(ABDMA)(NO<sub>3</sub>)(OH)<sup>+</sup>. NdO<sup>+</sup> is suggested to produce by reaction of Nd<sup>3+</sup> with the anodic oxidation products of water.

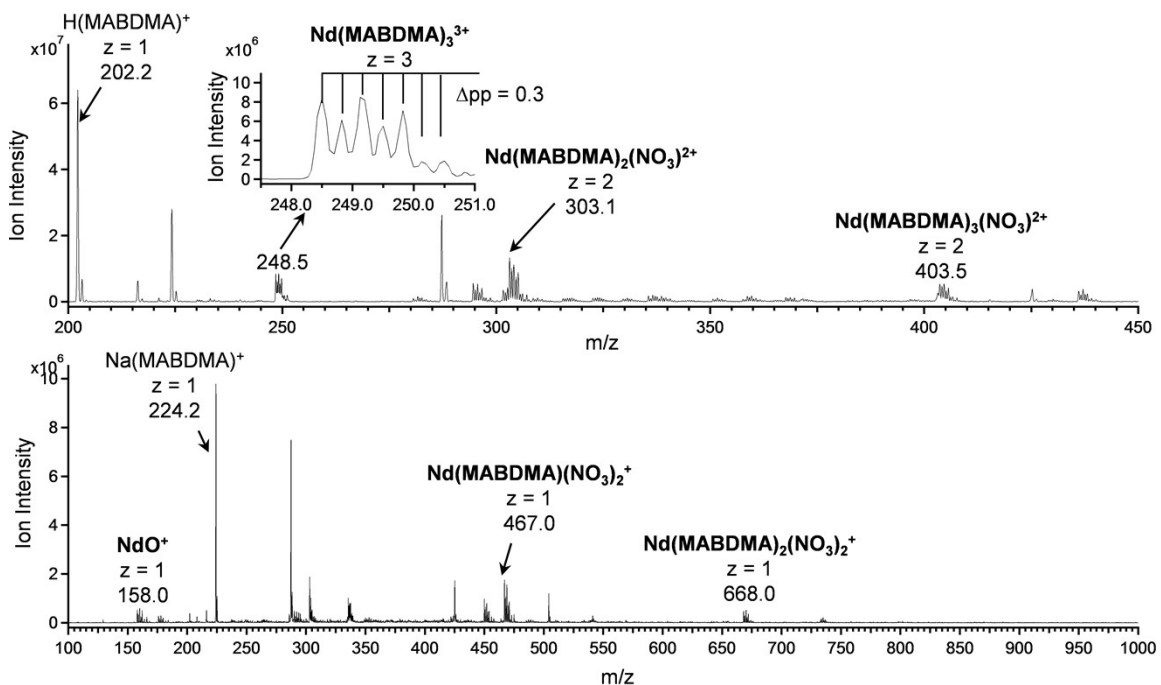

**Figure S6.** ESI-MS characterization of Nd<sup>3+</sup> complexes with MABDMA. In the top spectrum, triply and doubly charged Nd<sup>3+</sup> complexes were observed, including Nd(MABDMA)<sub>3</sub><sup>3+</sup>, Nd(MABDMA)<sub>2</sub>(NO<sub>3</sub>)<sub>2</sub><sup>2+</sup>, and Nd(MABDMA)<sub>3</sub>(NO<sub>3</sub>)<sub>2</sub><sup>2+</sup>. An inset figure shows a peak to peak separation of Δpp = 0.3 m/z for Nd(MABDMA)<sub>3</sub><sup>3+</sup>. The bottom spectrum shows singly charged complexes of Nd(MABDMA)(NO<sub>3</sub>)<sub>2</sub><sup>+</sup>, Nd(MABDMA)<sub>2</sub>(NO<sub>3</sub>)<sub>2</sub><sup>+</sup>. NdO<sup>+</sup> is suggested to produce by reaction of Nd<sup>3+</sup> with the anodic oxidation products of water.

| Ligand                | Titration 1 <sup>a</sup>        |                                  | Titration 2 <sup>a</sup>        |                                  | Titration 3 <sup>a</sup>         |                                 |
|-----------------------|---------------------------------|----------------------------------|---------------------------------|----------------------------------|----------------------------------|---------------------------------|
|                       | Initial Conditions              | Final Conditions                 | Starting Conditions             | Final Conditions                 | Starting Conditions              | Final Conditions                |
| <b><i>BnABDMA</i></b> | $n_L = 0.12$ mmol<br>pH = 10.68 | $n_L = 0.12$ mmol<br>pH = 2.64   | $n_L = 0.13$ mmol<br>pH = 8.93  | $n_L = 0.13$ mmol<br>pH = 2.66   | $n_L = 0.13$ mmol<br>pH = 3.04   | $n_L = 0.13$ mmol<br>pH = 10.40 |
| <b><i>ABDMA</i></b>   | $n_L = 0.067$ mmol<br>pH = 3.13 | $n_L = 0.067$ mmol<br>pH = 11.07 | $n_L = 0.066$ mmol<br>pH = 2.61 | $n_L = 0.066$ mmol<br>pH = 10.74 | $n_L = 0.070$ mmol<br>pH = 10.58 | $n_L = 0.070$ mmol<br>pH = 3.05 |
| <b><i>MABDMA</i></b>  | $n_L = 0.17$ mmol<br>pH = 11.24 | $n_L = 0.17$ mmol<br>pH = 2.48   | $n_L = 0.17$ mmol<br>pH = 2.64  | $n_L = 0.17$ mmol<br>pH = 11.26  | $n_L = 0.33$ mmol<br>pH = 3.13   | $n_L = 0.33$ mmol<br>pH = 11.86 |

**Table S1.** Experimental conditions for potentiometric titrations to determine protonation stability constant of BnABDMA, ABDMA, and MABDMA in 1M NaNO<sub>3</sub> solution. <sup>a</sup> Initial volume for each titration is at least 22.0 mL, and the final volume for each titration is ~30.0-35.0 mL; the titrant is a 0.1 M HNO<sub>3</sub> in 0.9 M NaNO<sub>3</sub> solution, or a 0.10M NaOH in 0.90M NaNO<sub>3</sub> solution.



| Ligand                | Titration 1 <sup>a</sup>             |                                      | Titration 2 <sup>a</sup>             |                                      | Titration 3 <sup>a</sup>             |                                      |
|-----------------------|--------------------------------------|--------------------------------------|--------------------------------------|--------------------------------------|--------------------------------------|--------------------------------------|
|                       | Initial Conditions                   | Final Conditions                     | Starting Conditions                  | Final Conditions                     | Starting Conditions                  | Final Conditions                     |
| <b><i>BnABDMA</i></b> | $n_{\text{Nd(III)}} = 0.10$<br>mmol  |
|                       | $n_{\text{ligand}} = 0.34$<br>mmol   | $n_{\text{ligand}} = 0.34$<br>mmol   | $n_{\text{ligand}} = 0.30$<br>mmol   | $n_{\text{ligand}} = 0.30$<br>mmol   | $n_{\text{ligand}} = 0.33$<br>mmol   | $n_{\text{ligand}} = 0.33$<br>mmol   |
|                       | $n_{\text{nitrate}} = 21.81$<br>mmol | $n_{\text{nitrate}} = 21.81$<br>mmol | $n_{\text{nitrate}} = 19.20$<br>mmol | $n_{\text{nitrate}} = 19.20$<br>mmol | $n_{\text{nitrate}} = 20.51$<br>mmol | $n_{\text{nitrate}} = 20.51$<br>mmol |
|                       | pH = 2.15                            | pH = 7.17                            | pH = 3.21                            | pH = 7.39                            | pH = 2.90                            | pH = 6.87                            |
| <b><i>ABDMA</i></b>   | $n_{\text{Nd(III)}} = 0.10$<br>mmol  |
|                       | $n_{\text{ligand}} = 0.31$<br>mmol   | $n_{\text{ligand}} = 0.31$<br>mmol   | $n_{\text{ligand}} = 0.51$<br>mmol   | $n_{\text{ligand}} = 0.51$<br>mmol   | $n_{\text{ligand}} = 0.25$<br>mmol   | $n_{\text{ligand}} = 0.25$<br>mmol   |
|                       | $n_{\text{nitrate}} = 21.88$<br>mmol | $n_{\text{nitrate}} = 21.88$<br>mmol | $n_{\text{nitrate}} = 26.18$<br>mmol | $n_{\text{nitrate}} = 26.18$<br>mmol | $n_{\text{nitrate}} = 20.85$<br>mmol | $n_{\text{nitrate}} = 20.85$<br>mmol |
|                       | pH = 3.12                            | pH = 6.63                            | pH = 3.20                            | pH = 7.09                            | pH = 2.99                            | pH = 6.80                            |
| <b><i>MABDMA</i></b>  | $n_{\text{Nd(III)}} = 0.16$<br>mmol  | $n_{\text{Nd(III)}} = 0.16$<br>mmol  | $n_{\text{Nd(III)}} = 0.14$<br>mmol  | $n_{\text{Nd(III)}} = 0.14$<br>mmol  | $n_{\text{Nd(III)}} = 0.36$<br>mmol  | $n_{\text{Nd(III)}} = 0.36$<br>mmol  |
|                       | $n_{\text{ligand}} = 0.37$<br>mmol   | $n_{\text{ligand}} = 0.37$<br>mmol   | $n_{\text{ligand}} = 0.38$<br>mmol   | $n_{\text{ligand}} = 0.38$<br>mmol   | $n_{\text{ligand}} = 2.48$<br>mmol   | $n_{\text{ligand}} = 2.48$<br>mmol   |
|                       | $n_{\text{nitrate}} = 18.79$<br>mmol | $n_{\text{nitrate}} = 18.79$<br>mmol | $n_{\text{nitrate}} = 18.56$<br>mmol | $n_{\text{nitrate}} = 18.56$<br>mmol | $n_{\text{nitrate}} = 28.01$<br>mmol | $n_{\text{nitrate}} = 28.01$<br>mmol |
|                       | pH = 3.04                            | pH = 6.18                            | pH = 3.08                            | pH = 6.44                            | pH = 3.75                            | pH = 6.02                            |

**Table S2.** Experimental conditions for potentiometric titrations to determine the stability constant for the formations of  $\text{Nd}^{3+}$  complexes with BnABDMA, ABDMA, and MABDMA. <sup>a</sup> Initial volume for each titration is at least 22.0 mL, and the final volume for each titration is ~30.0-35.0 mL; The ionic strength of solutions was adjusted to be ~1.0 using 1.0 M  $\text{NaNO}_3$ , the titrant is a 0.10M NaOH in 0.90M  $\text{NaNO}_3$  solution.

| Conditions/Ligands   | <i>BnABDMA</i> <sup>a</sup> | <i>ABDMA</i> <sup>b</sup> | <i>MABDMA</i> <sup>c</sup> |
|----------------------|-----------------------------|---------------------------|----------------------------|
| $n_{Nd(III)}$ (mmol) | 0.20                        | 0.20                      | 0.20                       |
| $n_{H^+}$ (mmol)     | 0.01                        | 0.01                      | 0.01                       |
| $n_{nitrate}$ (mmol) | 2.45                        | 1.66                      | 2.46                       |
| $n_{ligand}$ (mmol)  | 0                           | 0                         | 0                          |

**Table S3.** Experimental conditions for spectrophotometric titrations to verify the stability constant for the formation of Nd<sup>3+</sup> complexes with BnABDMA, ABDMA, and MABDMA. The initial total volume in cuvette was 2.20 ml, and ~1.50-1.80 mL of titrant was added with a volume of 0.1 ml for each addition. <sup>a</sup> The titrant contained BnABDMA (0.613 M), H<sup>+</sup> (0.20 M), and NaNO<sub>3</sub> (0.80 M). <sup>b</sup> The titrant contained ABDMA (0.880 M), H<sup>+</sup> (0.10 M), and NaNO<sub>3</sub> (0.90 M). <sup>c</sup> The titrant contained MABDMA (0.480 M), H<sup>+</sup> (0.20 M), and NaNO<sub>3</sub> (0.80 M)

| Ligand         | Titration 1 <sup>a</sup>                                     | Titration 2 <sup>a</sup>                                     | Titration 3 <sup>a</sup>                                     |
|----------------|--------------------------------------------------------------|--------------------------------------------------------------|--------------------------------------------------------------|
|                | Initial conditions                                           | Initial conditions                                           | Initial conditions                                           |
| <i>BnABDMA</i> | $n_L = 34.1 \mu\text{mol}$<br>$n_{H^+} = 0 \mu\text{mol}$    | $n_L = 33.9 \mu\text{mol}$<br>$n_{H^+} = 0 \mu\text{mol}$    | $n_L = 34.9 \mu\text{mol}$<br>$n_{H^+} = 0 \mu\text{mol}$    |
| <i>ABDMA</i>   | $n_L = 50.0 \mu\text{mol}$<br>$n_{H^+} = 25.7 \mu\text{mol}$ | $n_L = 50.0 \mu\text{mol}$<br>$n_{H^+} = 16.8 \mu\text{mol}$ | $n_L = 50.0 \mu\text{mol}$<br>$n_{H^+} = 12.4 \mu\text{mol}$ |
| <i>MABDMA</i>  | $n_L = 31.5 \mu\text{mol}$<br>$n_{H^+} = 5.0 \mu\text{mol}$  | $n_L = 31.5 \mu\text{mol}$<br>$n_{H^+} = 4.8 \mu\text{mol}$  | $n_L = 33.0 \mu\text{mol}$<br>$n_{H^+} = 23.2 \mu\text{mol}$ |

**Table S4.** Experimental conditions for calorimetric titrations to determine the enthalpy of the protonation of BnABDMA, ABDMA, and MABDMA in 1M NaNO<sub>3</sub> solution. <sup>a</sup> Initial volume is 750  $\mu\text{L}$ , and the final volume is 1.0 mL; the titrant is a 0.20 M HNO<sub>3</sub> in 0.80M NaNO<sub>3</sub> solution.

| Ligand                | Titration 1 <sup>a</sup>                                                                                                                                                       | Titration 2 <sup>a</sup>                                                                                                                                                      | Titration 3 <sup>a</sup>                                                                                                                                                      |
|-----------------------|--------------------------------------------------------------------------------------------------------------------------------------------------------------------------------|-------------------------------------------------------------------------------------------------------------------------------------------------------------------------------|-------------------------------------------------------------------------------------------------------------------------------------------------------------------------------|
|                       | Initial conditions                                                                                                                                                             | Initial conditions                                                                                                                                                            | Initial conditions                                                                                                                                                            |
| <b><i>BnABDMA</i></b> | $n_{\text{Nd(III)}} = 9.0 \mu\text{mol}$<br>$n_{\text{ligand}} = 60.0 \mu\text{mol}$<br>$n_{\text{nitrate}} = 750.0 \mu\text{mol}$<br>$n_{\text{H}^+} = 14.0 \mu\text{mol}$    | $n_{\text{Nd(III)}} = 15.0 \mu\text{mol}$<br>$n_{\text{ligand}} = 59.0 \mu\text{mol}$<br>$n_{\text{nitrate}} = 740.0 \mu\text{mol}$<br>$n_{\text{H}^+} = 14.0 \mu\text{mol}$  | $n_{\text{Nd(III)}} = 14.8 \mu\text{mol}$<br>$n_{\text{ligand}} = 41.5 \mu\text{mol}$<br>$n_{\text{nitrate}} = 750.0 \mu\text{mol}$<br>$n_{\text{H}^+} = 0 \mu\text{mol}$     |
| <b><i>ABDMA</i></b>   | $n_{\text{Nd(III)}} = 14.78 \mu\text{mol}$<br>$n_{\text{ligand}} = 57.7 \mu\text{mol}$<br>$n_{\text{nitrate}} = 750.0 \mu\text{mol}$<br>$n_{\text{H}^+} = 3.62 \mu\text{mol}$  | $n_{\text{Nd(III)}} = 14.78 \mu\text{mol}$<br>$n_{\text{ligand}} = 56.8 \mu\text{mol}$<br>$n_{\text{nitrate}} = 750.0 \mu\text{mol}$<br>$n_{\text{H}^+} = 25.0 \mu\text{mol}$ | $n_{\text{Nd(III)}} = 14.78 \mu\text{mol}$<br>$n_{\text{ligand}} = 56.0 \mu\text{mol}$<br>$n_{\text{nitrate}} = 750.0 \mu\text{mol}$<br>$n_{\text{H}^+} = 23.5 \mu\text{mol}$ |
| <b><i>MABDMA</i></b>  | $n_{\text{Nd(III)}} = 14.78 \mu\text{mol}$<br>$n_{\text{ligand}} = 38.04 \mu\text{mol}$<br>$n_{\text{nitrate}} = 750.0 \mu\text{mol}$<br>$n_{\text{H}^+} = 11.0 \mu\text{mol}$ | $n_{\text{Nd(III)}} = 14.78 \mu\text{mol}$<br>$n_{\text{ligand}} = 45.0 \mu\text{mol}$<br>$n_{\text{nitrate}} = 750.0 \mu\text{mol}$<br>$n_{\text{H}^+} = 4.1 \mu\text{mol}$  | $n_{\text{Nd(III)}} = 14.78 \mu\text{mol}$<br>$n_{\text{ligand}} = 35.0 \mu\text{mol}$<br>$n_{\text{nitrate}} = 750.0 \mu\text{mol}$<br>$n_{\text{H}^+} = 8.5 \mu\text{mol}$  |

**Table S5.** Experimental conditions for calorimetric titrations to determine the enthalpy for the formations of Nd<sup>3+</sup> complexes with BnABDMA, ABDMA, and MABDMA. <sup>a</sup> Initial volume is 750  $\mu\text{L}$ , and the final volume is 1.0 mL; the titrant is a 0.20 M HNO<sub>3</sub> in 0.80 M NaNO<sub>3</sub> solution.

| Ligand                                                              | Method <sup>a</sup> | Log $\beta$   | $\Delta H$ (kJ mol <sup>-1</sup> ) | $\Delta S$ (J K <sup>-1</sup> mol <sup>-1</sup> ) | Ref              |
|---------------------------------------------------------------------|---------------------|---------------|------------------------------------|---------------------------------------------------|------------------|
| <i>TMDGA</i>                                                        |                     |               |                                    |                                                   | 8                |
| Nd <sup>3+</sup> + L = NdL <sup>3+</sup>                            | sp, cal             | (3.53 ± 0.10) | -(10.9 ± 0.9)                      | (26 ± 1)                                          |                  |
| NdL <sup>3+</sup> + L = NdL <sub>2</sub> <sup>3+</sup>              | sp, cal             | (2.31 ± 0.19) | -(4.7 ± 1.5)                       | (13 ± 2)                                          |                  |
| NdL <sub>2</sub> <sup>3+</sup> + L = NdL <sub>3</sub> <sup>3+</sup> | sp, cal             | (0.96 ± 0.19) | -(3.7 ± 2.2)                       | (20 ± 7)                                          |                  |
| <i>BnABDMA</i>                                                      |                     |               |                                    |                                                   | <i>this work</i> |
| H + L = HL <sup>+</sup>                                             | pot, cal            | (6.36 ± 0.09) | -(31.2 ± 0.3)                      | (17 ± 1)                                          |                  |
| Nd <sup>3+</sup> + L = NdL <sup>3+</sup>                            | pot, sp, cal        | (2.92 ± 0.09) | -(13.3 ± 0.6)                      | (11 ± 1)                                          |                  |
| NdL <sup>3+</sup> + L = NdL <sub>2</sub> <sup>3+</sup>              | pot, sp, cal        | (2.16 ± 0.09) | -(9.3 ± 1.2)                       | (10 ± 3)                                          |                  |
| NdL <sub>2</sub> <sup>3+</sup> + L = NdL <sub>3</sub> <sup>3+</sup> | pot, sp, cal        | (2.05 ± 0.09) | -(8.3 ± 0.9)                       | (12 ± 2)                                          |                  |
| <i>ABDMA</i>                                                        |                     |               |                                    |                                                   | <i>this work</i> |
| H + L = HL <sup>+</sup>                                             | pot, cal            | (7.12 ± 0.09) | -(37.2 ± 2.1)                      | (11 ± 6)                                          |                  |
| Nd <sup>3+</sup> + L = NdL <sup>3+</sup>                            | pot, sp, cal        | (4.08 ± 0.09) | -(13.5 ± 0.6)                      | (32 ± 2)                                          |                  |
| NdL <sup>3+</sup> + L = NdL <sub>2</sub> <sup>3+</sup>              | pot, sp, cal        | (2.85 ± 0.09) | -(7.0 ± 2.1)                       | (32 ± 6)                                          |                  |
| NdL <sub>2</sub> <sup>3+</sup> + L = NdL <sub>3</sub> <sup>3+</sup> | pot, sp, cal        | (3.99 ± 0.9)  | -(18.9 ± 1.5)                      | -(4 ± 4)                                          |                  |
| <i>MABDMA</i>                                                       |                     |               |                                    |                                                   | <i>this work</i> |
| H + L = HL <sup>+</sup>                                             | pot, cal            | (7.64 ± 0.09) | -(33.5 ± 0.6)                      | (34 ± 2)                                          |                  |
| Nd <sup>3+</sup> + L = NdL <sup>3+</sup>                            | pot, sp, cal        | (4.40 ± 0.09) | -(11.4 ± 0.3)                      | (46 ± 1)                                          |                  |
| NdL <sup>3+</sup> + L = NdL <sub>2</sub> <sup>3+</sup>              | pot, sp, cal        | (3.12 ± 0.36) | -(12.0 ± 1.2)                      | (19 ± 3)                                          |                  |
| NdL <sub>2</sub> <sup>3+</sup> + L = NdL <sub>3</sub> <sup>3+</sup> | sp, cal             | (2.98 ± 0.50) | -(10.9 ± 1.5)                      | (21 ± 4)                                          |                  |

Table S6: Stepwise equilibrium constants,  $\Delta H$ , and  $\Delta S$  for the protonation and complexation of BnABDMA, ABDMA, and MABDMA, with Nd<sup>3+</sup> at 25 °C and  $I = 1.0$  NaNO<sub>3</sub>. <sup>a</sup> Pot: potentiometry, sp: spectrophotometry, cal: calorimetry.
